# Supplementary material for: Cell cycle-dependent and -independent telomere shortening accompanies murine brain aging
Source: publisher site journal article supplement (doi:10.18632/aging.101655), 2018-11-20
Supplement: Supplementary file [file aging-v10i11-101655-supplementary-material-SD1.pdf]

SUPPLEMENTARY FIGURES

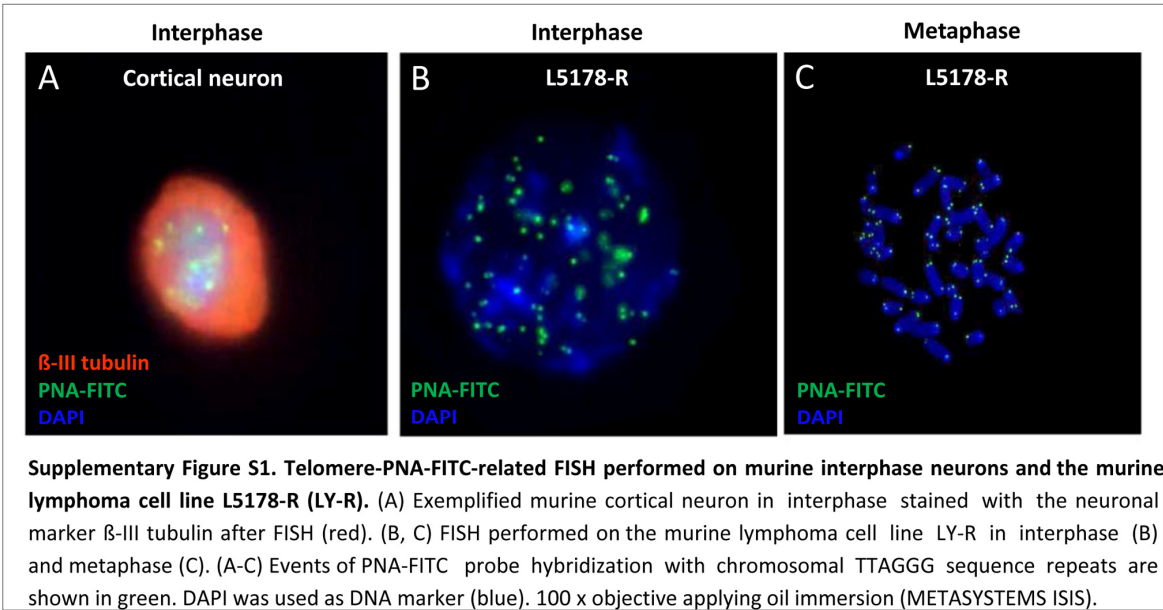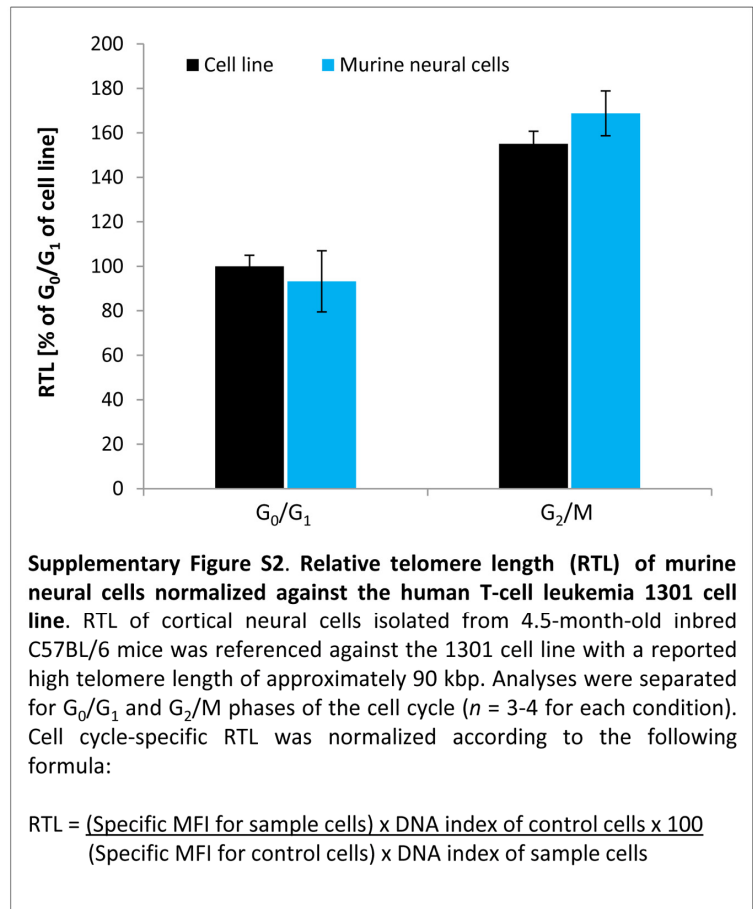

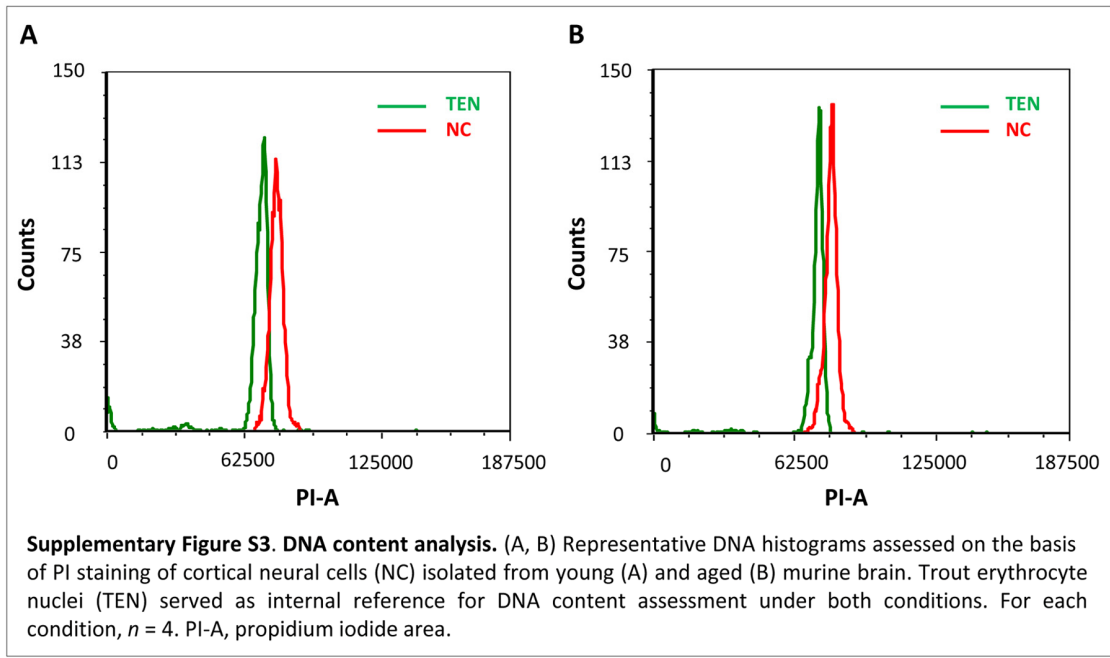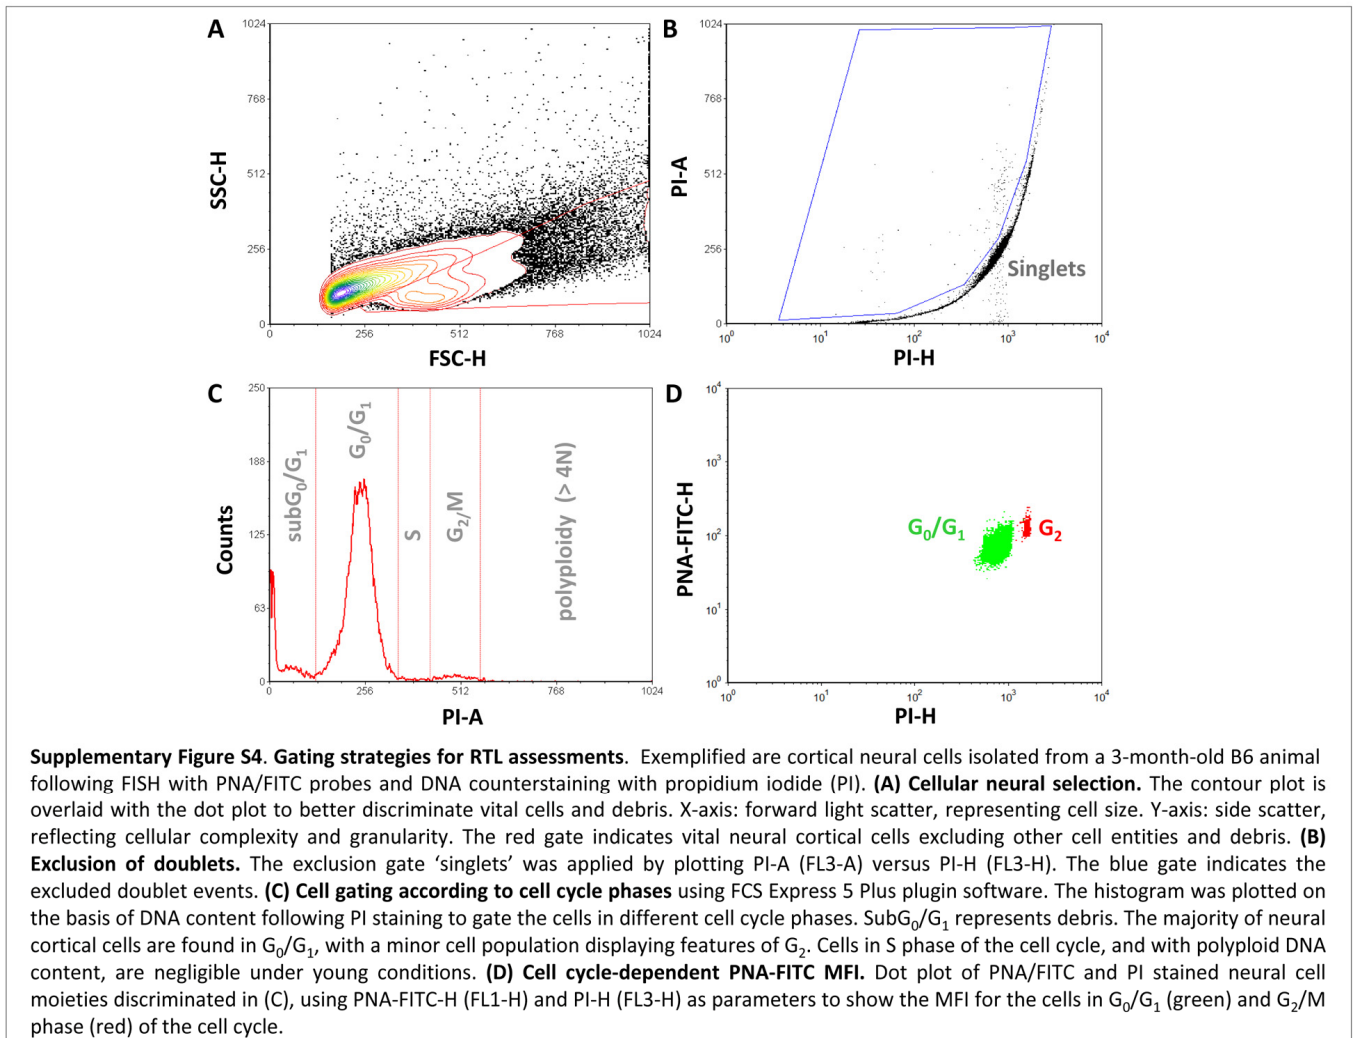

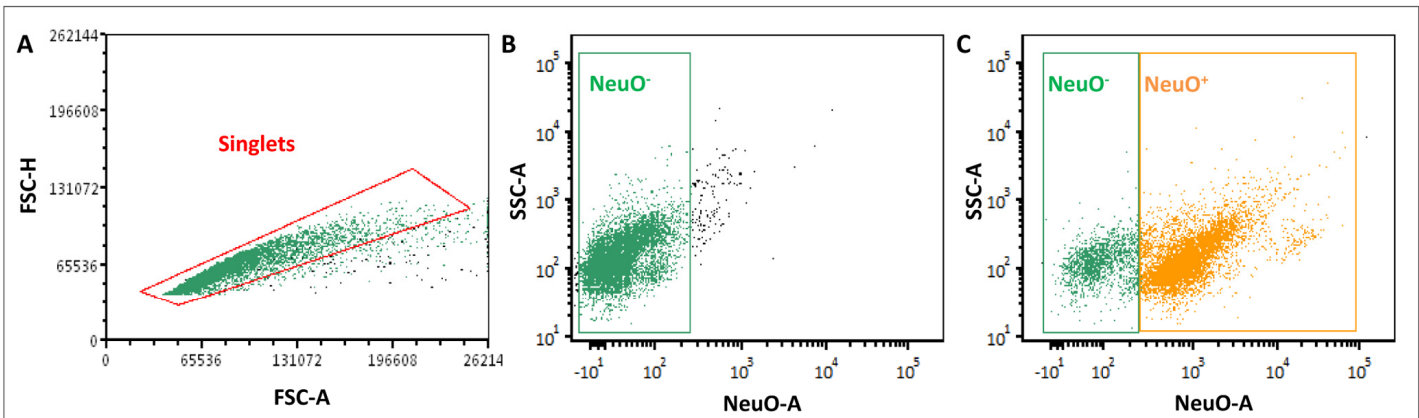

**Supplementary Figure S5. C criteria for NeuO-based selection of neurons via FACS.** Exemplified are dot plots of cortical neural cells isolated from young murine brain, illustrating the selection of singlets on the basis of FSC-A and FSC-H parameters (A), and the selection of NeuO-negative fractions (NeuO<sup>-</sup>; B) and NeuO-positive cell moieties (NeuO<sup>+</sup>; C) on the basis of NeuO-A and SSC-A. The NeuO-positive fraction indicates the neuronal population. For each condition,  $n = 4$ . SSC-A, side scatter area; NeuO-A, NeuO area; FSC-H, forward scatter height; FSC-A, forward scatter area.
